# Supplementary material for: Enhanced thermoelectric performance and reversed anisotropy in the Janus penta-PdSeTe monolayer via biaxial strain
Source: Royal Society of Chemistry journal article supplement (doi:10.1039/d4tc04616a), 2025-01-01
Supplement: d4tc04616a1.pdf [file d4tc04616a1.pdf]

## Supplementary Information

### Enhanced thermoelectric performance and reversed anisotropy in Janus penta-PdSeTe monolayer via biaxial strain

Qiong Xia,<sup>a</sup> Yushen Liu<sup>b</sup> and Guoying Gao<sup>\*a</sup>

<sup>a</sup> School of Physics, Huazhong University of Science and Technology, Wuhan 430074, China

<sup>b</sup> College of Electronic and Information Engineering, Changshu Institute of Technology, Changshu, 215500, China

\*Corresponding author. E-mail: guoying\_gao@mail.hust.edu.cn

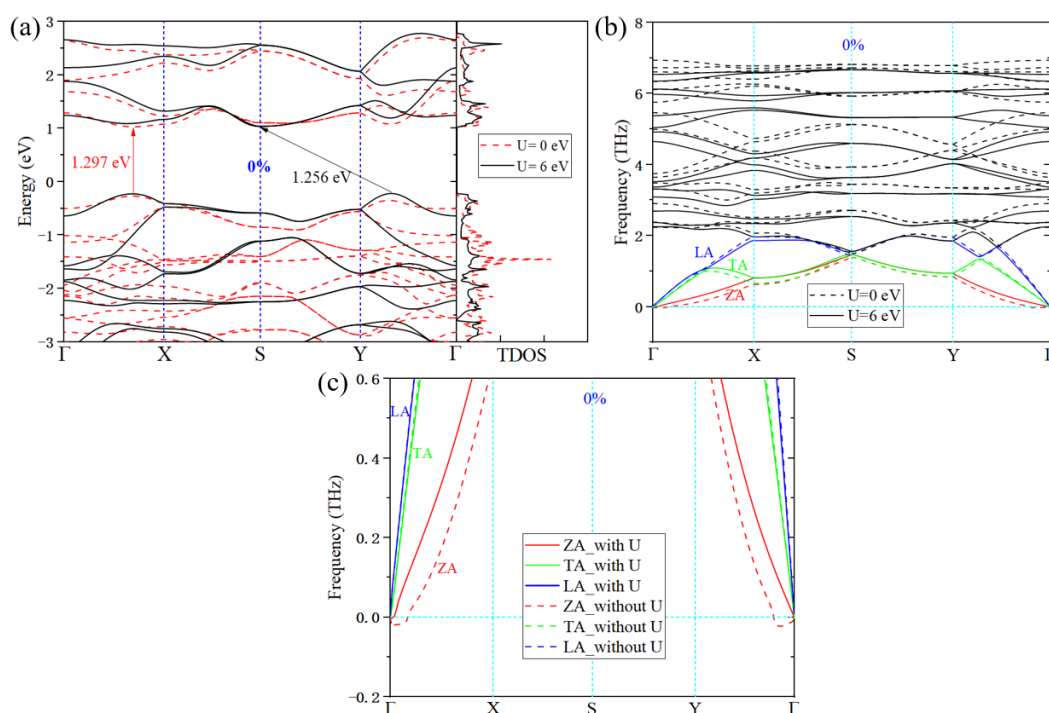

**Fig. S1** Band structure (a) and phonon spectrum (b) within PBE and PBE+U for penta-PdSeTe monolayer. The enlarged phonon spectrum (c) is also presented in order to clearly show the imaginary frequency without U.

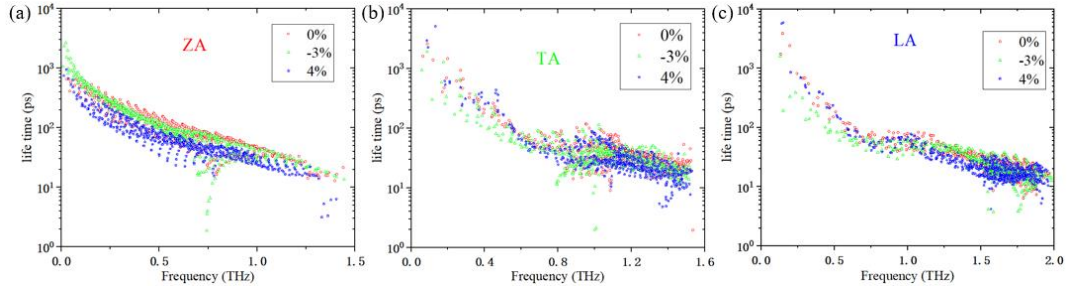

**Fig. S2** The phonon life time of ZA (a), TA (b), LA (c) branches at 300 K for PdSeTe monolayer under different strains.

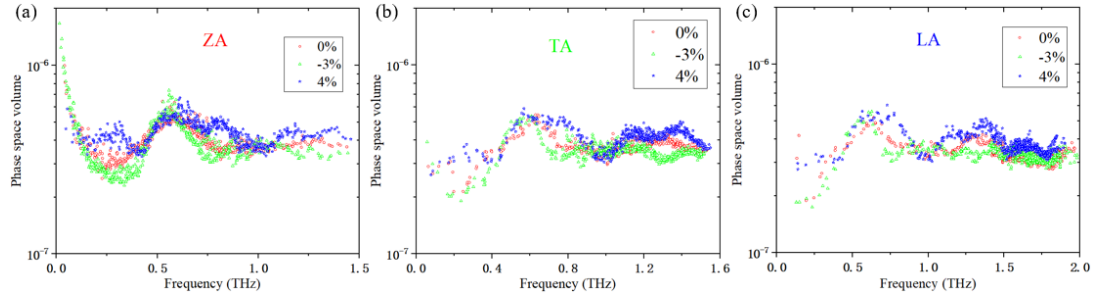

**Fig. S3** The phase space volume of ZA (a), TA (b), LA (c) branches at 300 K for PdSeTe monolayer under different strains.
